# Supplementary material for: Large-Emitting-Area Quantum Dot Light-Emitting Diodes Fabricated by an All-Solution Process
Source: MDPI journal article supplement (doi:10.3390/ijms241814350), 2023-09-20
Supplement: s1 [file s1]

Supplementary Document:

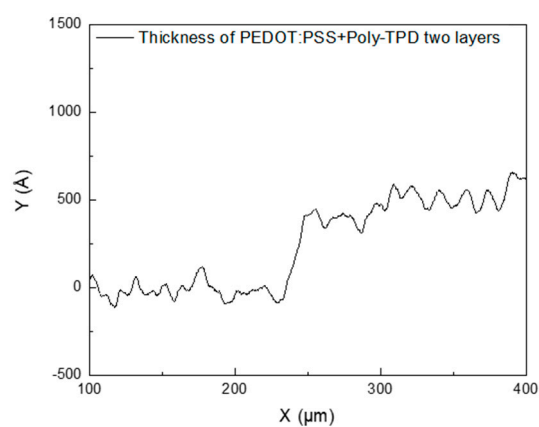

Figure S1. Total thickness of PEDOT: PSS and poly-TPD two layers

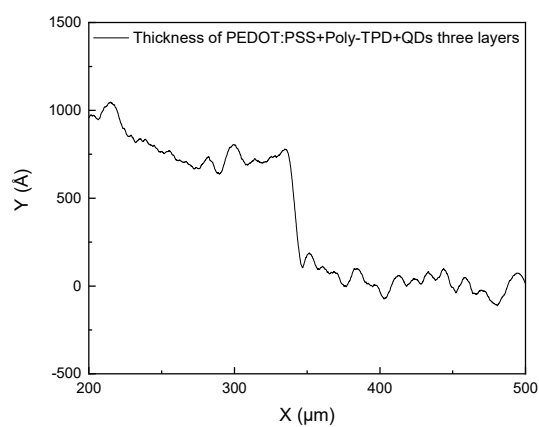

Figure S2. Total thickness of PEDOT: PSS, poly-TPD and QDs three layers

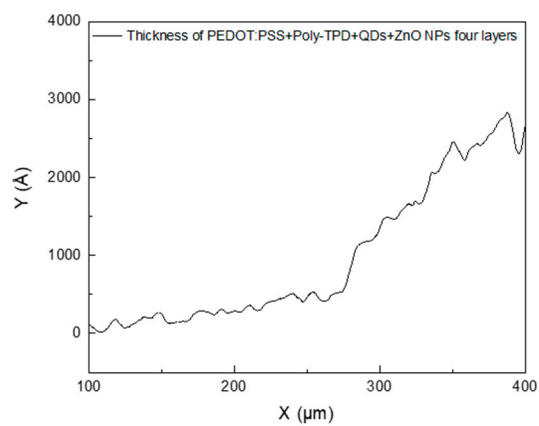

Figure S3. Total thickness of PEDOT: PSS, ply-TPD, QDs and ZnO nanoparticles four layers

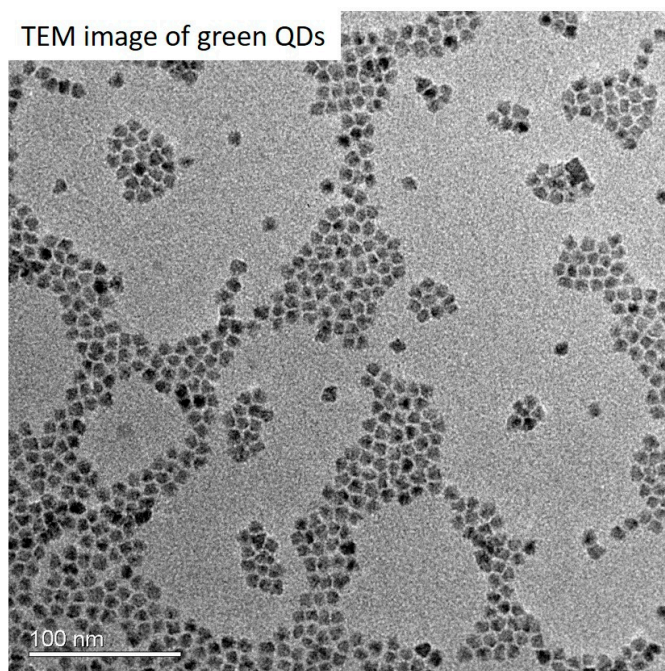

Figure S4. TEM image of green QDs.

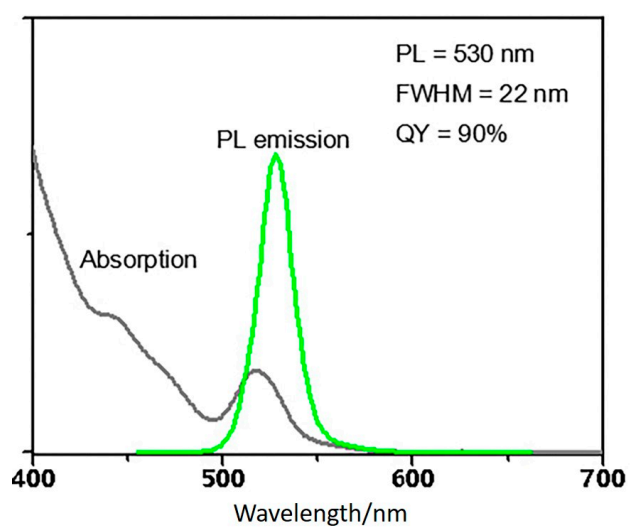

Figure S5. Normalized absorption and fluorescence spectra of green QDs.
